# Supplementary material for: Surface-initiated atom transfer radical polymerization of cationic corona on iron oxide nanoparticles for magnetic sorting of macrophages
Source: Royal Society of Chemistry journal article supplement (doi:10.1039/c8bm00418h), 2018-01-01
Supplement: c8bm00418h1.pdf [file c8bm00418h1.pdf]

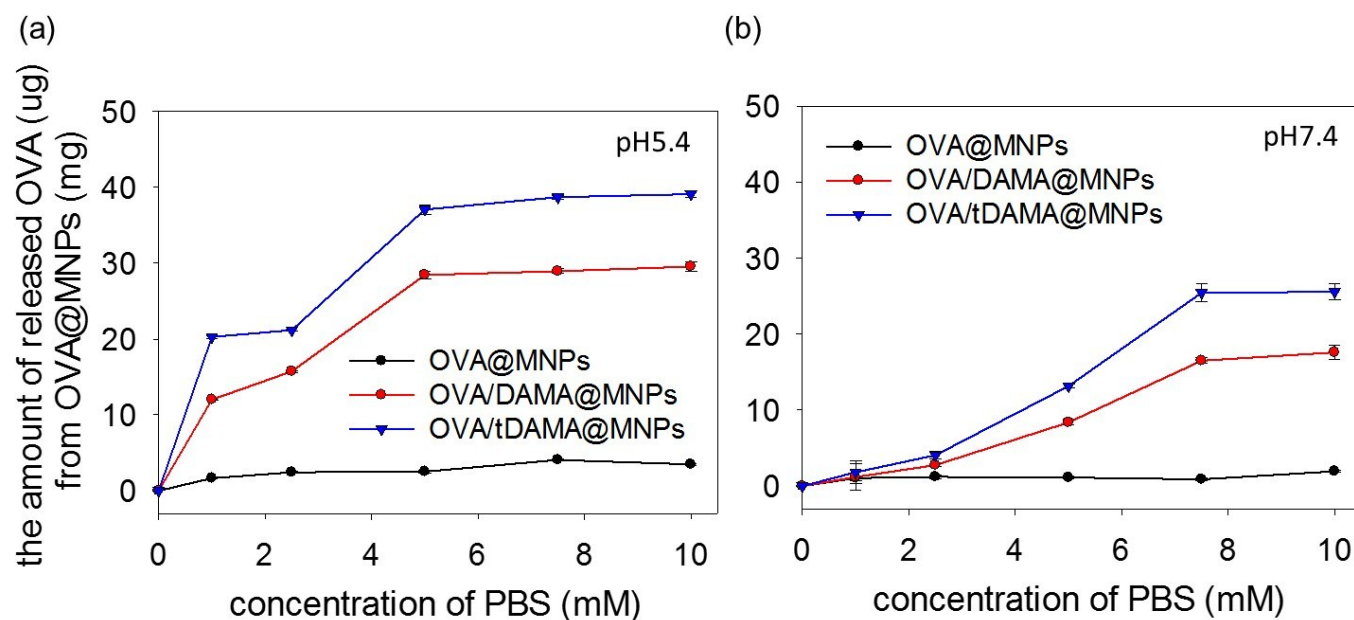

**Figure S1.** Release profiles of OVA from OVA@MNPs according to concentration of PBS or pH level. OVA@MNPs (2 mg) were incubated in various concentration of PBS (pH 5.4 (a) or 7.4 (b)) at 37 °C for 12h and the cumulative release amount of OVA was quantified by BCA assay.
